# Supplementary material for: Analysis of charge transfer transitions in stacked π-electron donor–acceptor complexes
Source: Royal Society of Chemistry journal article supplement (doi:10.1039/c8cp04770g), 2018-01-01
Supplement: c8cp04770g1.pdf [file c8cp04770g1.pdf]

## Supporting information

### Analysis of Charge Transfer Transitions in Stacked $\pi$ -Donor-Acceptor Complexes

Zhong-hua Cui,<sup>a,b</sup> Adélia J. A. Aquino,<sup>a,c</sup> Andrew C.-H. Sue<sup>a</sup> and Hans Lischka<sup>a,c</sup>

<sup>a</sup> School of Pharmaceutical Sciences and Technology, Tianjin University, Tianjin 300072, P.R. China

<sup>b</sup> Institute of Atomic and Molecular Physics, Jilin University, Changchun 130012, P. R. China

<sup>c</sup> Department of Chemistry and Biochemistry, Texas Tech University, Lubbock, Texas 79409, United States

#### Table of Contents

|                                                                           |       |
|---------------------------------------------------------------------------|-------|
| <b>Table S1:</b> EA, IP and CE energies                                   | p. 2  |
| <b>Table S2:</b> Vertical excitation energies in the PDI/DAN complex      | p. 2  |
| <b>Table S3:</b> Vertical excitation energies in the pCIA/TMPD complex    | p. 3  |
| <b>Table S4:</b> Vertical excitation energies in the TCNB/Bpe complex     | p. 4  |
| <b>Table S5:</b> Basis set dependence of the vertical excitation energies | p. 5  |
| <b>Figure S1:</b> Molecular orbitals                                      | p. 6  |
| <b>Figure S2.</b> $\Omega_{AB}$ plots                                     | p. 7  |
| <b>Figure S3.</b> Electrostatic potential                                 | p. 8  |
| <b>Table S6</b> Coordinates for the ground states.                        | p. 9  |
| <b>Table S7.</b> Coordinates for the excited states.                      | p. 12 |

**Table S1.** Electron affinity (EA) and ionization potential (IP) of acceptor and donor in the dimers, respectively, and intermolecular Coulomb interaction (CE) energies based on NPA charges computed at the PBE0-D3/cc-pVDZ level. All energies are in eV.

| Complexes | EA/IP     | IP - EA | Coulomb int. |
|-----------|-----------|---------|--------------|
| PDI/DAN   | 1.62/6.76 | 5.14    | -3.24        |
| pCIA/TMPD | 2.42/5.90 | 3.48    | -2.44        |
| TCNB/Bpe  | 2.33/8.94 | 6.61    | -0.21        |

**Table S2.** Vertical excitation energies  $\Delta E_{exc}$  (eV) for the PDI/DAN complex, oscillator strengths and charge transfer (q(CT) in  $e$ ) using the SOS/ADC(2)/cc-pVDZ method.

| State                      | $\Delta E_{exc}$ | f    | CT   |
|----------------------------|------------------|------|------|
| PBE0-D3/cc-pVDZ geometries |                  |      |      |
| $S_1$                      | 3.00             | 0.07 | 0.95 |
| $S_2$                      | 3.85             | 0.01 | 0.95 |
| $S_3$                      | 3.92             | 0.00 | 0.62 |
| $S_4$                      | 4.02             | 0.09 | 0.30 |
| $S_5$                      | 4.23             | 0.00 | 0.03 |
| $S_6$                      | 4.33             | 0.00 | 0.04 |
| $S_7$                      | 4.37             | 0.12 | 0.06 |
| $S_8$                      | 4.52             | 0.00 | 0.96 |
| SOS-MP2/cc-pVDZ geometry   |                  |      |      |
| $S_1$                      | 3.16             | 0.07 | 0.96 |
| $S_2$                      | 3.96             | 0.01 | 0.95 |
| $S_3$                      | 3.98             | 0.01 | 0.35 |
| $S_4$                      | 4.04             | 0.06 | 0.35 |
| $S_5$                      | 4.20             | 0.00 | 0.03 |
| $S_6$                      | 4.30             | 0.00 | 0.03 |
| $S_7$                      | 4.42             | 0.12 | 0.06 |
| $S_8$                      | 4.49             | 0.00 | 0.97 |

**Table S3.** Vertical excitation energies  $\Delta E_{\text{exc}}$  (eV) for the pCIA/TMPD complex, oscillator strengths and charge transfer ( $q(\text{CT})$  in  $e$  units) using the SOS-ADC(2)/cc-pVDZ.

| State                      | $\Delta E_{\text{exc}}$ | f    | CT   |
|----------------------------|-------------------------|------|------|
| PBE0-D3/cc-pVDZ geometries |                         |      |      |
| $S_1$                      | 1.18                    | 0.08 | 0.86 |
| $S_2$                      | 3.21                    | 0.05 | 0.89 |
| $S_3$                      | 3.25                    | 0.06 | 0.62 |
| $S_4$                      | 3.44                    | 0.00 | 0.08 |
| $S_5$                      | 3.52                    | 0.00 | 0.27 |
| $S_6$                      | 3.61                    | 0.00 | 0.47 |
| $S_7$                      | 4.28                    | 0.12 | 0.61 |
| $S_8$                      | 4.29                    | 0.02 | 0.34 |
| SOS-MP2/cc-pVDZ geometry   |                         |      |      |
| $S_1$                      | 1.77                    | 0.08 | 0.92 |
| $S_2$                      | 3.44                    | 0.00 | 0.06 |
| $S_3$                      | 3.48                    | 0.01 | 0.24 |
| $S_4$                      | 3.71                    | 0.03 | 0.71 |
| $S_5$                      | 3.76                    | 0.05 | 0.45 |
| $S_6$                      | 3.89                    | 0.00 | 0.70 |
| $S_7$                      | 4.29                    | 0.00 | 0.29 |
| $S_8$                      | 4.44                    | 0.00 | 0.58 |

**Table S4.** Vertical excitation energies  $\Delta E_{\text{exc}}$  (eV) for the TCNB/Bpe complex, oscillator strengths and charge transfer ( $q(\text{CT})$  in  $e$  units) using the SOS/ADC(2)/cc-pVDZ.

| State                      | $\Delta E_{\text{exc}}$ | f    | CT   |
|----------------------------|-------------------------|------|------|
| PBE0-D3/cc-pVDZ geometries |                         |      |      |
| $S_1$                      | 4.06                    | 0.04 | 0.71 |
| $S_2$                      | 4.48                    | 0.05 | 0.30 |
| $S_3$                      | 4.66                    | 0.10 | 0.24 |
| $S_4$                      | 4.68                    | 0.01 | 0.11 |
| $S_5$                      | 4.78                    | 0.41 | 0.16 |
| $S_6$                      | 4.85                    | 0.00 | 0.02 |
| $S_7$                      | 4.89                    | 0.00 | 0.10 |
| $S_8$                      | 4.93                    | 0.29 | 0.65 |
| SOS-MP2/cc-pVDZ geometry   |                         |      |      |
| $S_1$                      | 4.09                    | 0.03 | 0.61 |
| $S_2$                      | 4.39                    | 0.04 | 0.43 |
| $S_3$                      | 4.59                    | 0.04 | 0.07 |
| $S_4$                      | 4.60                    | 0.00 | 0.25 |
| $S_5$                      | 4.76                    | 0.14 | 0.38 |
| $S_6$                      | 4.86                    | 0.63 | 0.43 |
| $S_7$                      | 4.88                    | 0.01 | 0.02 |
| $S_8$                      | 4.92                    | 0.01 | 0.11 |

**Table S5.** Basis set dependence of the vertical excitation energies  $\Delta E_{\text{exc}}$  (eV), oscillator strengths ( $f$ ) and charge transfer values  $q(\text{CT})$  for the two lowest states of the three complexes investigated.<sup>a</sup>

| Methods                | States         | $\Delta E_{\text{exc}}$ | $q(\text{CT})$ | $f$  |
|------------------------|----------------|-------------------------|----------------|------|
| PDI/DAN                |                |                         |                |      |
| SOS-ADC(2)/cc-pVDZ     | S <sub>1</sub> | 3.00                    | 0.95           | 0.07 |
|                        | S <sub>2</sub> | 3.85                    | 0.95           | 0.01 |
| SOS-ADC(2)/aug-cc-pVDZ | S <sub>1</sub> | 2.95                    | 0.98           | 0.06 |
|                        | S <sub>2</sub> | 3.73                    | 0.10           | 0.01 |
| pCIA/TMPD              |                |                         |                |      |
| SOS-ADC(2)/cc-pVDZ     | S <sub>1</sub> | 1.18                    | 0.86           | 0.08 |
|                        | S <sub>2</sub> | 3.21                    | 0.89           | 0.05 |
| SOS-ADC(2)/aug-cc-pVDZ | S <sub>1</sub> | 1.10                    | 0.85           | 0.07 |
|                        | S <sub>2</sub> | 3.11                    | 0.60           | 0.06 |
| TCNB/Bpe               |                |                         |                |      |
| SOS-ADC(2)/cc-pVDZ     | S <sub>1</sub> | 4.06                    | 0.71           | 0.04 |
|                        | S <sub>2</sub> | 4.48                    | 0.30           | 0.05 |
| SOS-ADC(2)/aug-cc-pVDZ | S <sub>1</sub> | 3.97                    | 0.74           | 0.04 |
|                        | S <sub>2</sub> | 4.41                    | 0.20           | 0.08 |

<sup>a</sup> gas phase calculations using the PBE0-D3 geometry.

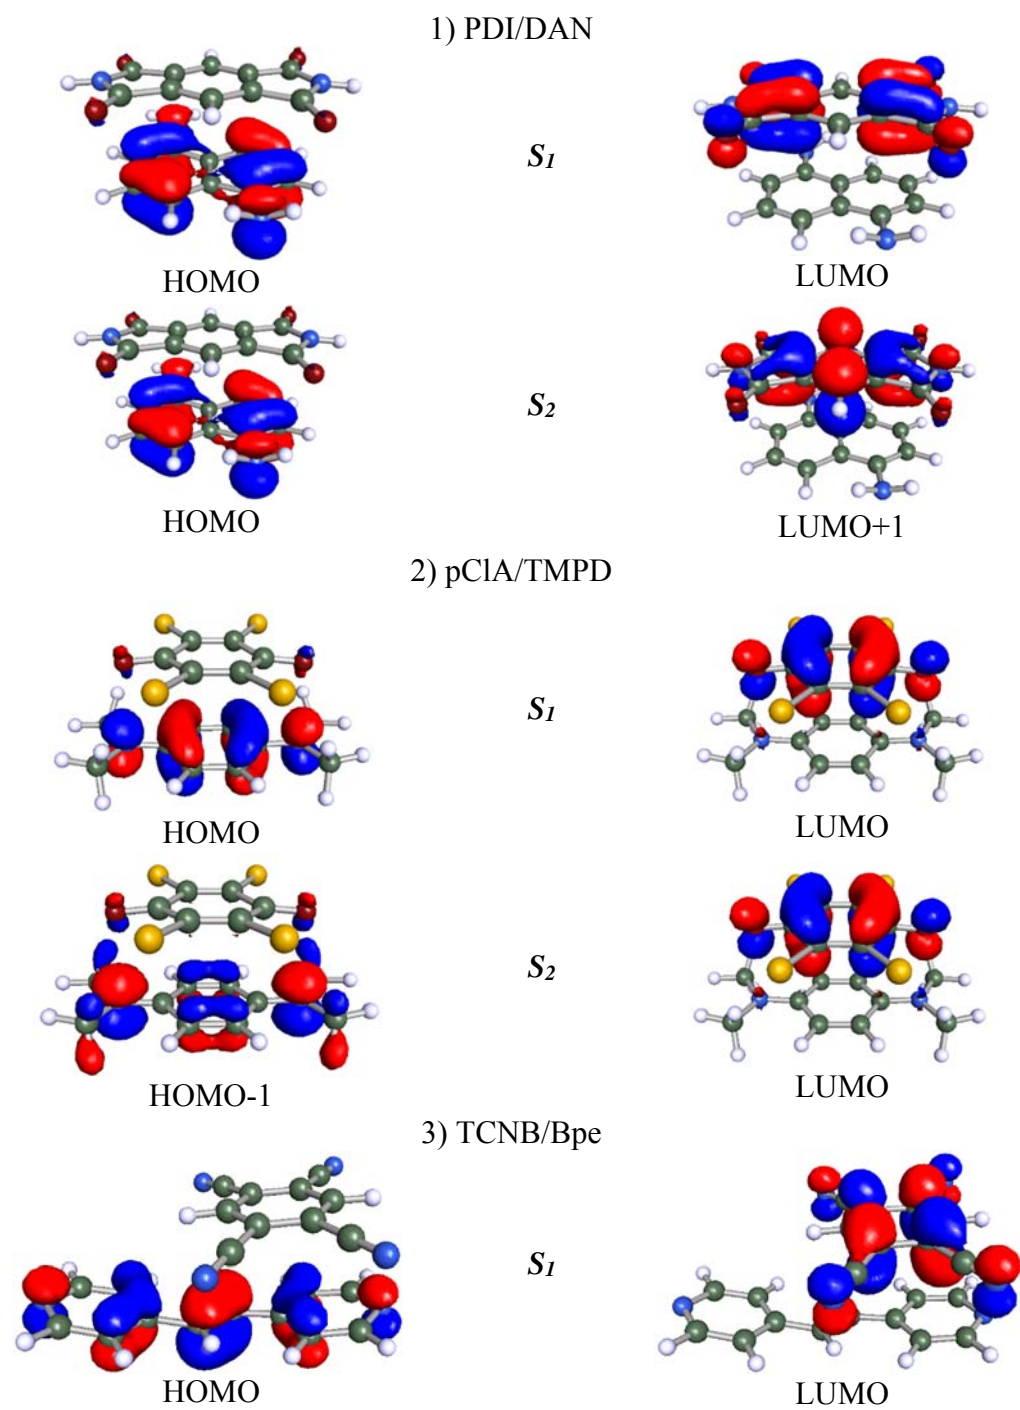

**Figure S1.** Molecular orbitals obtained at the PBE0-D3/cc-pVDZ level, and the lowest charge-transfer transition are illustrated.

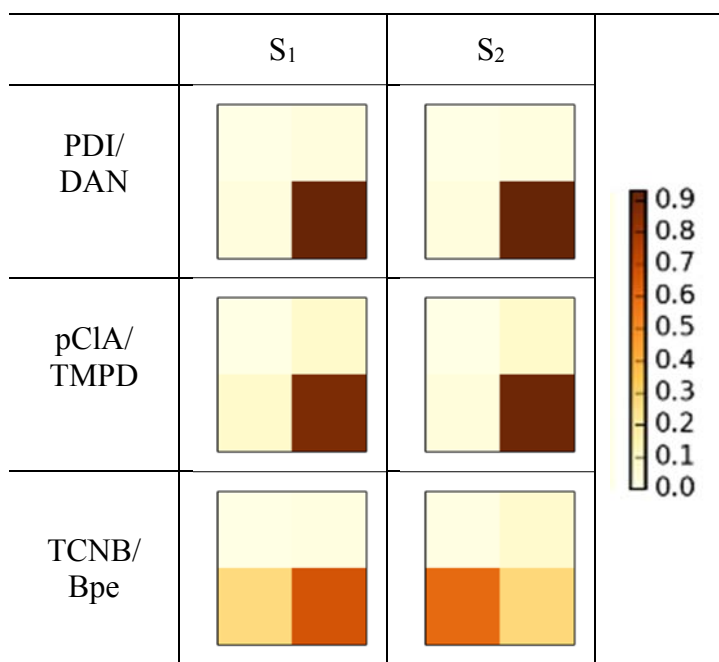

**Figure S2.**  $\Omega_{AB}^n$  plots for the first two excited states of the three complexes investigated using the SOS-ADC(2)/cc-pVDZ level. The two segments in the plots represent the two monomers in the complex.

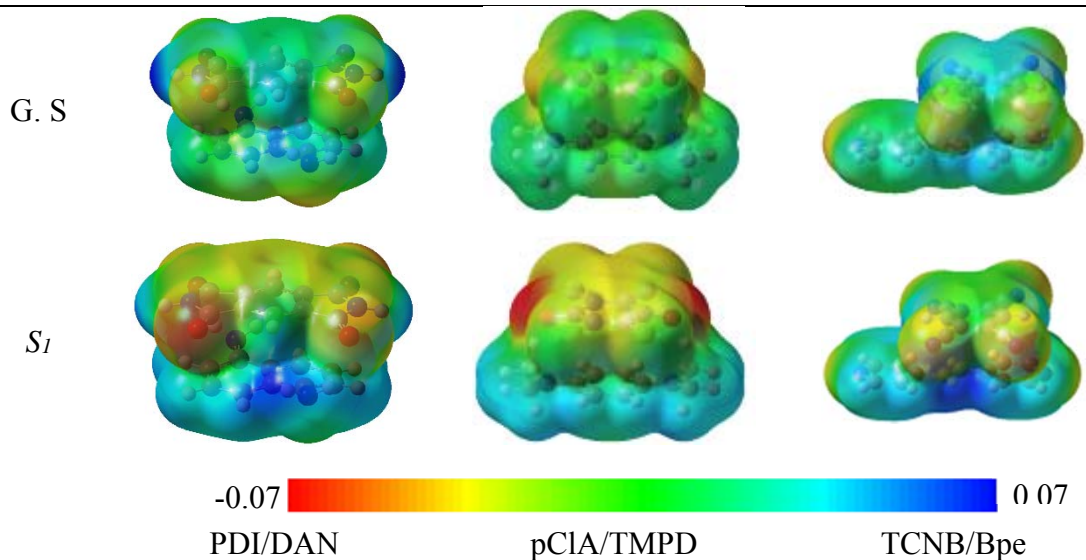

---

**Figure S3.** Projection of the electrostatic potential on the molecular van der Waals surface using the SOS-MP2(G.S.) and SOS-ADC(2) (*S*<sub>1</sub>) methods with the cc-pVDZ basis for the gas phase. Geometries have been optimized for the respective state in gas phase. The vdW surface is defined by the 0.001 e/bohr<sup>3</sup> contour of the electronic density.



**Table S6.** Coordinates for the ground states.

| PBE0                |            |            |            | SOS-MP2 |            |            |            |
|---------------------|------------|------------|------------|---------|------------|------------|------------|
| <b>1) PDI/DAN</b>   |            |            |            |         |            |            |            |
| O                   | 3.0775293  | 2.1883464  | 1.4113142  | O       | 3.1060366  | -2.2125177 | 1.4974760  |
| O                   | 2.9388954  | 2.3930894  | 1.6571914  | O       | 2.9620318  | 2.4116781  | 1.6713660  |
| N                   | 3.3467579  | 0.1088441  | 1.6140178  | N       | 3.3768849  | 0.1070253  | 1.6633344  |
| C                   | 2.6195972  | -1.0745027 | 1.5367457  | C       | 2.6468766  | -1.0890509 | 1.5874699  |
| C                   | 2.5469789  | 1.2521363  | 1.6383546  | C       | 2.5716405  | 1.2621134  | 1.6590907  |
| C                   | 1.1926792  | -0.6586373 | 1.6193512  | C       | 1.2038180  | -0.6656435 | 1.6338566  |
| C                   | 1.1468632  | 0.7401417  | 1.6448635  | C       | 1.1580616  | 0.7442682  | 1.6512251  |
| C                   | -0.0475423 | 1.4459526  | 1.6472323  | C       | -0.0472409 | 1.4590643  | 1.6595833  |
| H                   | -0.0824359 | 2.5356308  | 1.6503829  | H       | -0.0808035 | 2.5535047  | 1.6784027  |
| O                   | -3.0775252 | 2.1882074  | 1.4112812  | O       | -3.1060456 | 2.2124982  | 1.4974554  |
| O                   | -2.9388260 | -2.3931142 | 1.6572637  | O       | -2.9620195 | -2.4116910 | 1.6713916  |
| N                   | -3.3467370 | -0.1088731 | 1.6140369  | N       | -3.3768879 | -0.1070372 | 1.6633328  |
| C                   | -2.6195807 | 1.0743599  | 1.5367604  | C       | -2.6468846 | 1.0890410  | 1.5874630  |
| C                   | -2.5469578 | -1.2522053 | 1.6383944  | C       | -2.5716217 | -1.2621189 | 1.6591084  |
| C                   | -1.1927957 | 0.6586736  | 1.6193625  | C       | -1.2038064 | 0.6656569  | 1.6338608  |
| C                   | -1.1469252 | -0.7400853 | 1.6448642  | C       | -1.1580907 | -0.7442527 | 1.6512210  |
| C                   | 0.0473688  | -1.4458948 | 1.6472097  | C       | 0.0472478  | -1.4591018 | 1.6595820  |
| H                   | 0.0825342  | -2.5354885 | 1.6502809  | H       | 0.0808016  | -2.5534944 | 1.6783916  |
| N                   | -1.4818056 | 2.6850354  | -1.3839994 | N       | -1.4772686 | 2.7286842  | -1.4577370 |
| N                   | 1.4819712  | -2.6850546 | -1.3839102 | N       | 1.4772342  | -2.7286863 | -1.4577215 |
| C                   | -1.3527035 | 1.3121552  | -1.4951379 | C       | -1.3622913 | 1.3230197  | -1.5079743 |
| C                   | -0.0505454 | 0.7123589  | -1.5828892 | C       | -0.0517216 | 0.7169241  | -1.5779808 |
| C                   | 1.1258088  | 1.4996313  | -1.6180331 | C       | 1.1379722  | 1.5138221  | -1.6339415 |
| H                   | 1.0634547  | 2.5863561  | -1.6761918 | H       | 1.0696773  | 2.6035503  | -1.7121925 |
| C                   | 2.3640258  | 0.8937454  | -1.6237461 | C       | 2.3839627  | 0.9003705  | -1.6494308 |
| H                   | 3.2675237  | 1.5051139  | -1.6639733 | H       | 3.2928576  | 1.5112195  | -1.7132042 |
| C                   | 2.4808608  | -0.5015191 | -1.5410078 | C       | 2.4990862  | -0.5138858 | -1.5625750 |
| H                   | 3.4686325  | -0.9658868 | -1.4937233 | H       | 3.4917532  | -0.9816151 | -1.5363957 |
| C                   | 1.3526942  | -1.3121311 | -1.4951660 | C       | 1.3622589  | -1.3230128 | -1.5079719 |
| C                   | 0.0505192  | -0.7122933 | -1.5828955 | C       | 0.0517137  | -0.7169276 | -1.5779778 |
| C                   | -1.1259015 | -1.4996411 | -1.6180148 | C       | -1.1379830 | -1.5137782 | -1.6339315 |
| H                   | -1.0634799 | -2.5862537 | -1.6761953 | H       | -1.0696714 | -2.6035624 | -1.7121867 |
| C                   | -2.3639517 | -0.8936737 | -1.6236586 | C       | -2.3839441 | -0.9003503 | -1.6494134 |
| H                   | -3.2674470 | -1.5051652 | -1.6638711 | H       | -3.2928619 | -1.5112192 | -1.7131843 |
| C                   | -2.4808039 | 0.5014972  | -1.5409357 | C       | -2.4990351 | 0.5138698  | -1.5625642 |
| H                   | -3.4685979 | 0.9658956  | -1.4936514 | H       | -3.4917695 | 0.9816276  | -1.5363756 |
| H                   | -2.3500593 | 2.9709329  | -0.9408156 | H       | -2.3870676 | 3.0095971  | -1.0887650 |
| H                   | -0.6972489 | 3.1454886  | -0.9370739 | H       | -0.7611361 | 3.1484889  | -0.8639620 |
| H                   | 0.6971828  | -3.1454322 | -0.9370722 | H       | 0.7611444  | -3.1484619 | -0.8639499 |
| H                   | 2.3500064  | -2.9709417 | -0.9406930 | H       | 2.3870857  | -3.0095977 | -1.0887448 |
| H                   | 4.3554851  | 0.1440117  | 1.5369034  | H       | 4.3908077  | 0.1413882  | 1.6022869  |
| H                   | -4.3554989 | -0.1441181 | 1.5368442  | H       | -4.3908021 | -0.1414069 | 1.6022823  |
| <b>2) pCIA/TMPD</b> |            |            |            |         |            |            |            |
| H                   | 0.9755271  | 50.2576503 | 12.3981289 | H       | 1.1330806  | 50.2200475 | 12.3742849 |
| H                   | 3.6038051  | 50.2485242 | 9.7717471  | H       | 3.9164186  | 49.6590517 | 9.4261953  |
| H                   | -0.9754198 | 50.2577285 | 5.2238309  | H       | -0.8158147 | 49.7580075 | 4.9712576  |
| H                   | -3.6038367 | 50.2486325 | 7.8503449  | H       | -3.5665810 | 50.3615391 | 7.9477546  |
| H                   | -1.0952635 | 48.4676019 | 5.1301504  | H       | -1.4482869 | 48.1256860 | 5.3855234  |
| H                   | -3.6776142 | 48.4570735 | 7.7452564  | H       | -3.5599571 | 48.5871046 | 7.6402645  |
| H                   | 1.0952319  | 48.4677060 | 12.4919276 | H       | 1.3908798  | 48.4396958 | 12.2902816 |
| H                   | 3.6776894  | 48.4571410 | 9.8767222  | H       | 3.5184031  | 48.0105106 | 10.0257082 |

|    |            |            |            |    |            |            |            |
|----|------------|------------|------------|----|------------|------------|------------|
| C  | -0.3604467 | 49.2398503 | 10.1524758 | C  | -0.1949891 | 49.6148475 | 10.0794255 |
| C  | 1.0186755  | 49.2769710 | 9.8229686  | C  | 1.1728125  | 49.5081902 | 9.7172428  |
| C  | -1.3393639 | 49.2401619 | 9.1801710  | C  | -1.2187076 | 49.6439014 | 9.1159537  |
| C  | 1.6164386  | 49.3905545 | 12.1795346 | C  | 1.8407025  | 49.4325444 | 12.0685686 |
| C  | 3.3788592  | 49.3790258 | 10.4073755 | C  | 3.5198814  | 49.0921068 | 10.2843781 |
| H  | -0.6737985 | 49.2408935 | 11.1950120 | H  | -0.4908142 | 49.6777718 | 11.1302836 |
| H  | -2.3797452 | 49.2434690 | 9.5006002  | H  | -2.2474775 | 49.7276623 | 9.4768939  |
| H  | 2.5252872  | 49.4904479 | 12.7825537 | H  | 2.7493372  | 49.5551770 | 12.6787567 |
| H  | 3.9883450  | 49.4636842 | 11.3135476 | H  | 4.2085472  | 49.2514418 | 11.1290753 |
| N  | 1.9836520  | 49.3539498 | 10.7824167 | N  | 2.2009966  | 49.5945415 | 10.6618117 |
| C  | 0.3604584  | 49.2398530 | 7.4695213  | C  | 0.4223090  | 49.3588555 | 7.3699571  |
| C  | -1.0185985 | 49.2770143 | 7.7990069  | C  | -0.9432331 | 49.5674925 | 7.7262025  |
| C  | 1.3393675  | 49.2401495 | 8.4419436  | C  | 1.4396561  | 49.3304267 | 8.3270539  |
| C  | -1.6164166 | 49.3906241 | 5.4423792  | C  | -1.6676037 | 49.2155729 | 5.4131810  |
| C  | -3.3789128 | 49.3791074 | 7.2146444  | C  | -3.3321580 | 49.5841657 | 7.2028468  |
| H  | 0.6737473  | 49.2408790 | 6.4269603  | H  | 0.7088814  | 49.2278226 | 6.3233152  |
| H  | 2.3797372  | 49.2434681 | 8.1213549  | H  | 2.4626197  | 49.1785439 | 7.9730476  |
| H  | -2.5253823 | 49.4905375 | 4.8394258  | H  | -2.5467647 | 49.4145552 | 4.7801845  |
| H  | -3.9883638 | 49.4637846 | 6.3083675  | H  | -3.9922800 | 49.7513955 | 6.3371284  |
| N  | -1.9836595 | 49.3540871 | 6.8395836  | N  | -1.9452661 | 49.7101864 | 6.7598212  |
| Cl | -0.7969069 | 52.4582174 | 11.8474762 | Cl | -0.8851544 | 52.7756995 | 12.2636991 |
| Cl | -3.0421079 | 52.4670591 | 9.5843461  | Cl | -3.2488420 | 52.8403728 | 10.0529994 |
| C  | -0.4092586 | 52.3828653 | 10.1733841 | C  | -0.5765965 | 52.7129791 | 10.5605908 |
| C  | 1.0329425  | 52.2910263 | 9.8517132  | C  | 0.8734837  | 52.6114086 | 10.1714480 |
| C  | -1.3652101 | 52.3851487 | 9.2099238  | C  | -1.5726257 | 52.7402618 | 9.6289772  |
| O  | 1.8895650  | 52.1695378 | 10.7138754 | O  | 1.7663871  | 52.5960458 | 11.0062526 |
| Cl | 0.7969460  | 52.4582590 | 5.7745282  | Cl | 0.4754758  | 52.6118413 | 6.0627175  |
| Cl | 3.0420811  | 52.4670183 | 8.0377462  | Cl | 2.8408570  | 52.5484624 | 8.2747480  |
| C  | 0.4092611  | 52.3828641 | 7.4486400  | C  | 0.1648317  | 52.5942938 | 7.7653396  |
| C  | -1.0328947 | 52.2909792 | 7.7703965  | C  | -1.2835831 | 52.6713660 | 8.1537582  |
| C  | 1.3652279  | 52.3851219 | 8.4120764  | C  | 1.1626840  | 52.5673227 | 8.6986911  |
| O  | -1.8896447 | 52.1693323 | 6.9081019  | O  | -2.1756602 | 52.7075384 | 7.3187302  |

| 3) TCNB/Bpe |            |            |            |   |            |            |            |
|-------------|------------|------------|------------|---|------------|------------|------------|
| N           | 4.0448009  | 0.6287084  | 1.7846232  | N | 4.0292749  | 0.7144292  | 1.7443522  |
| C           | 3.6627020  | 1.7113671  | 1.1027048  | C | 3.6278043  | 1.7982809  | 1.0465168  |
| C           | 2.6873185  | 1.7008315  | 0.1085630  | C | 2.6262885  | 1.7748544  | 0.0594431  |
| H           | 2.4100752  | 2.6307297  | -0.3941590 | H | 2.3501874  | 2.7022686  | -0.4582541 |
| C           | 2.0410894  | 0.4983250  | -0.2142249 | C | 1.9721657  | 0.5601137  | -0.2443481 |
| C           | 2.4723134  | -0.6481691 | 0.4737322  | C | 2.4161120  | -0.5865852 | 0.4565705  |
| C           | 3.4591072  | -0.5260496 | 1.4453999  | C | 3.4259362  | -0.4539267 | 1.4221829  |
| C           | 0.9269591  | 0.5162126  | -1.1587475 | C | 0.8659103  | 0.5507506  | -1.2268007 |
| N           | -1.5678167 | -2.6241459 | 1.4117051  | N | -1.7156129 | -2.6562416 | 1.6924679  |
| N           | -1.3944825 | 4.0070183  | -0.0665897 | N | -1.3813635 | 4.0812238  | 0.1550182  |
| C           | -1.1896074 | -1.5711140 | 1.7245376  | C | -1.2586943 | -1.5966652 | 1.9530911  |
| C           | -0.7022082 | -0.2639654 | 2.0365008  | C | -0.6871397 | -0.2894882 | 2.2101276  |
| C           | -1.1817817 | 0.8250643  | 1.3089565  | C | -1.1681221 | 0.8213765  | 1.4914543  |
| H           | -1.9495646 | 0.6756440  | 0.5502415  | H | -1.9885317 | 0.6978901  | 0.7776852  |
| C           | -0.6368827 | 2.0937268  | 1.5072418  | C | -0.5713144 | 2.0837824  | 1.6654060  |
| C           | -1.0617774 | 3.1671976  | 0.6640512  | C | -1.0214529 | 3.1965147  | 0.8528677  |
| H           | 3.7873054  | -1.4109214 | 1.9998729  | H | 3.7713102  | -1.3384665 | 1.9737407  |
| H           | 0.2831532  | -1.4809895 | -0.9390286 | H | 0.0581377  | -1.3586985 | -0.7543693 |
| N           | -3.5623450 | -0.4351466 | -3.6543830 | N | -3.4984692 | -0.5354757 | -3.9931629 |
| C           | -3.0736416 | -1.5547653 | -3.1184324 | C | -3.0676776 | -1.6214580 | -3.3194530 |
| C           | -1.8875986 | -1.6176944 | -2.3911708 | C | -1.9553379 | -1.6285758 | -2.4594414 |
| H           | -1.5553794 | -2.5661977 | -1.9634985 | H | -1.6714531 | -2.5511445 | -1.9383425 |
| C           | -1.1342120 | -0.4509060 | -2.2015765 | C | -1.2133423 | -0.4421444 | -2.2732042 |
| C           | -1.6502423 | 0.7307365  | -2.7581443 | C | -1.6667608 | 0.7056191  | -2.9657236 |
| C           | -2.8471269 | 0.6785913  | -3.4628554 | C | -2.7903996 | 0.6009635  | -3.7985598 |
| C           | 0.0897232  | -0.5098532 | -1.4055626 | C | -0.0465828 | -0.4496857 | -1.3629301 |

|   |            |            |            |   |            |            |            |
|---|------------|------------|------------|---|------------|------------|------------|
| H | -3.2605456 | 1.5940721  | -3.8976643 | H | -3.1505708 | 1.4856469  | -4.3396262 |
| H | 0.7372793  | 1.4865664  | -1.6286473 | H | 0.7675389  | 1.4598091  | -1.8355013 |
| N | 1.4903952  | 4.5996087  | 2.7903777  | N | 1.6738842  | 4.5804970  | 2.8777698  |
| N | 1.2882982  | -2.0919461 | 4.3034538  | N | 1.3536958  | -2.2077311 | 4.4246309  |
| C | 0.9829767  | 3.5647595  | 2.6468001  | C | 1.1401037  | 3.5330262  | 2.7478415  |
| C | 0.3811035  | 2.2804624  | 2.4663065  | C | 0.5020861  | 2.2421517  | 2.5822270  |
| C | 0.8418796  | 1.1961974  | 3.2143186  | C | 0.9698377  | 1.1355296  | 3.3164456  |
| C | 0.3147040  | -0.0774259 | 2.9965411  | C | 0.3878981  | -0.1328219 | 3.1246217  |
| C | 0.8433288  | -1.1912752 | 3.7205682  | C | 0.9124605  | -1.2767599 | 3.8435845  |
| H | -1.1434590 | 1.6897386  | -2.6370866 | H | -1.1701921 | 1.6760354  | -2.8554930 |
| H | -3.6672159 | -2.4613758 | -3.2733112 | H | -3.6460325 | -2.5421366 | -3.4721670 |
| H | 2.0405258  | -1.6299356 | 0.2713850  | H | 1.9961574  | -1.5781087 | 0.2527551  |
| H | 4.1519233  | 2.6514896  | 1.3767746  | H | 4.1281545  | 2.7435297  | 1.2951503  |
| H | 1.6446598  | 1.3360965  | 3.9368864  | H | 1.8098405  | 1.2530888  | 4.0078863  |

**Table S7.** Coordinates for the exited states.

| wB97xD              |            |            |            | SOS-ADC(2) |            |            |            |
|---------------------|------------|------------|------------|------------|------------|------------|------------|
| <b>1) PDI/DAN</b>   |            |            |            |            |            |            |            |
| O                   | 2.5142510  | -2.8605460 | 1.4741340  | O          | 3.1167998  | -2.2200334 | 1.2930274  |
| O                   | 3.5326860  | 1.6322550  | 1.6886620  | O          | 2.9875156  | 2.4014177  | 1.4634483  |
| N                   | 3.3152730  | -0.6850110 | 1.6607620  | N          | 3.3551761  | 0.0900854  | 1.5827507  |
| C                   | 2.3113150  | -1.6602040 | 1.6357860  | C          | 2.6161795  | -1.1099727 | 1.5353373  |
| C                   | 2.8309320  | 0.6357190  | 1.7261070  | C          | 2.5555951  | 1.2574918  | 1.5989666  |
| C                   | 1.0621530  | -0.9129030 | 1.7301350  | C          | 1.2175532  | -0.7011689 | 1.6985450  |
| C                   | 1.3773410  | 0.4884000  | 1.7760400  | C          | 1.1727593  | 0.7553450  | 1.7158100  |
| C                   | 0.3890930  | 1.4611820  | 1.7940600  | C          | -0.0332808 | 1.4633790  | 1.7160546  |
| H                   | 0.6349980  | 2.5240970  | 1.8258430  | H          | -0.0481803 | 2.5612361  | 1.7229694  |
| O                   | -2.3694390 | 2.9729140  | 1.5519990  | O          | -3.1168032 | 2.2199749  | 1.2930055  |
| O                   | -3.3907860 | -1.5227100 | 1.4656010  | O          | -2.9875217 | -2.4014456 | 1.4634882  |
| N                   | -3.1760820 | 0.7916610  | 1.5891650  | N          | -3.3552092 | -0.0901090 | 1.5827397  |
| C                   | -2.1715990 | 1.7658490  | 1.6514950  | C          | -2.6161272 | 1.1099631  | 1.5353266  |
| C                   | -2.6923360 | -0.5302590 | 1.5858080  | C          | -2.5556023 | -1.2575102 | 1.5989802  |
| C                   | -0.9251380 | 1.0128370  | 1.7413030  | C          | -1.2176519 | 0.7012263  | 1.6985316  |
| C                   | -1.2403030 | -0.3870920 | 1.6911890  | C          | -1.1727097 | -0.7554039 | 1.7158228  |
| C                   | -0.2523090 | -1.3609680 | 1.6965750  | C          | 0.0332857  | -1.4634862 | 1.7160665  |
| H                   | -0.5000470 | -2.4232080 | 1.6571250  | H          | 0.0481661  | -2.5612047 | 1.7229886  |
| N                   | -2.1707650 | 2.1442730  | -1.3542110 | N          | -1.5197844 | 2.6470240  | -1.1975050 |
| N                   | 2.0403300  | -2.2427640 | -1.3694990 | N          | 1.5197814  | -2.6470217 | -1.1974885 |
| C                   | -1.7002320 | 0.8907700  | -1.5434800 | C          | -1.3615338 | 1.3182336  | -1.4405890 |
| C                   | -0.2828270 | 0.6337230  | -1.5922290 | C          | -0.0482267 | 0.7239924  | -1.5846151 |
| C                   | 0.6541760  | 1.6708970  | -1.6010510 | C          | 1.1193254  | 1.5003164  | -1.6804048 |
| H                   | 0.3303320  | 2.7107010  | -1.6243920 | H          | 1.0667713  | 2.5928015  | -1.7360614 |
| C                   | 2.0276420  | 1.3950250  | -1.6125030 | C          | 2.3958932  | 0.8819053  | -1.7120142 |
| H                   | 2.7415240  | 2.2174350  | -1.6067590 | H          | 3.2917741  | 1.5066500  | -1.7909377 |
| C                   | 2.4870980  | 0.0958470  | -1.5716170 | C          | 2.5209371  | -0.4961008 | -1.5861880 |
| H                   | 3.5563680  | -0.1081590 | -1.5149700 | H          | 3.5079425  | -0.9674111 | -1.5269057 |
| C                   | 1.5785000  | -0.9849530 | -1.5212990 | C          | 1.3615732  | -1.3182555 | -1.4405763 |
| C                   | 0.1615370  | -0.7265850 | -1.6289460 | C          | 0.0481710  | -0.7239533 | -1.5846129 |
| C                   | -0.7691310 | -1.7597480 | -1.7552950 | C          | -1.1193290 | -1.5002834 | -1.6803783 |
| H                   | -0.4441020 | -2.7967520 | -1.8354470 | H          | -1.0667697 | -2.5927798 | -1.7360231 |
| C                   | -2.1392240 | -1.4791050 | -1.8094550 | C          | -2.3958058 | -0.8818190 | -1.7119825 |
| H                   | -2.8531260 | -2.2973250 | -1.8935170 | H          | -3.2918165 | -1.5066629 | -1.7909059 |
| C                   | -2.6008970 | -0.1829280 | -1.7047060 | C          | -2.5209176 | 0.4960944  | -1.5861834 |
| H                   | -3.6726380 | 0.0159700  | -1.6807500 | H          | -3.5079528 | 0.9674438  | -1.5268920 |
| H                   | -3.1598680 | 2.2332930  | -1.1565640 | H          | -2.3842293 | 2.8897501  | -0.7057312 |
| H                   | -1.6211980 | 2.7920730  | -0.7991330 | H          | -0.7187843 | 3.1287769  | -0.7955270 |
| H                   | 1.4417110  | -2.9231880 | -0.9158720 | H          | 0.7188138  | -3.1287375 | -0.7955355 |
| H                   | 3.0050970  | -2.3484470 | -1.0780770 | H          | 2.3842177  | -2.8897190 | -0.7057345 |
| H                   | 4.3021950  | -0.9071830 | 1.6553970  | H          | 4.3589568  | 0.1180236  | 1.4294651  |
| H                   | -4.1625040 | 1.0151180  | 1.5725850  | H          | -4.3589519 | -0.1180530 | 1.4294677  |
| <b>2) pCIA/TMPD</b> |            |            |            |            |            |            |            |
| H                   | 2.0069810  | 50.6391310 | 12.3157690 | H          | 1.2153112  | 50.4084867 | 12.3094421 |
| H                   | 3.4400380  | 50.5008300 | 9.8693650  | H          | 3.5044853  | 50.4266818 | 10.0390074 |
| H                   | -1.3126200 | 50.3382140 | 5.3092240  | H          | -1.2153162 | 50.4084791 | 5.3125744  |
| H                   | -3.5290640 | 50.2368030 | 7.5580990  | H          | -3.5044735 | 50.4266810 | 7.5830109  |
| H                   | -0.9384170 | 48.6024850 | 4.9788400  | H          | -0.8855229 | 48.6328837 | 5.0984354  |
| H                   | -3.8159030 | 48.4696850 | 7.7987890  | H          | -3.7176959 | 48.6602452 | 7.9577533  |
| H                   | 0.4523140  | 49.8148160 | 12.2261440 | H          | 0.8855237  | 48.6328826 | 12.5235633 |
| H                   | 3.5412220  | 48.7120070 | 9.6405620  | H          | 3.7176839  | 48.6602432 | 9.6642500  |

|    |            |            |            |    |            |            |            |
|----|------------|------------|------------|----|------------|------------|------------|
| C  | -0.4968180 | 48.9968060 | 10.0433680 | C  | -0.3775833 | 49.0772283 | 10.1692428 |
| C  | 0.8843660  | 49.1818480 | 9.7234970  | C  | 1.0226423  | 49.0988173 | 9.8273716  |
| C  | -1.4480690 | 48.8847240 | 9.0701880  | C  | -1.3561704 | 49.0783539 | 9.1968094  |
| C  | 1.5236210  | 49.6865430 | 12.0597780 | C  | 1.6159409  | 49.3885647 | 12.1929803 |
| C  | 3.2327770  | 49.5187390 | 10.3177350 | C  | 3.3905252  | 49.3969976 | 10.4148284 |
| H  | -0.8200990 | 48.9575490 | 11.0803690 | H  | -0.6907389 | 49.1332829 | 11.2135080 |
| H  | -2.4853240 | 48.7838500 | 9.3774520  | H  | -2.3983440 | 49.1361560 | 9.5165138  |
| H  | 1.9037720  | 48.8772860 | 12.7024010 | H  | 2.5256067  | 49.2805634 | 12.7994007 |
| H  | 3.8175210  | 49.4333470 | 11.2402980 | H  | 4.0017791  | 49.2651926 | 11.3182203 |
| N  | 1.8220400  | 49.3992220 | 10.6642540 | N  | 1.9798062  | 49.1588382 | 10.7804367 |
| C  | 0.2764130  | 49.0295290 | 7.3630770  | C  | 0.3775846  | 49.0772167 | 7.4527650  |
| C  | -1.1117300 | 48.9524100 | 7.6840500  | C  | -1.0226429 | 49.0988215 | 7.7946408  |
| C  | 1.2286750  | 49.1484030 | 8.3361320  | C  | 1.3561671  | 49.0783443 | 8.4251983  |
| C  | -1.6930070 | 49.3050230 | 5.3569180  | C  | -1.6159426 | 49.3885617 | 5.4290287  |
| C  | -3.4474710 | 49.2362050 | 7.1038150  | C  | -3.3905263 | 49.3969952 | 7.2071796  |
| H  | 0.5973690  | 49.0791740 | 6.3264300  | H  | 0.6907390  | 49.1333009 | 6.4085009  |
| H  | 2.2615950  | 49.2912110 | 8.0278490  | H  | 2.3983423  | 49.1361363 | 8.1055001  |
| H  | -2.5809530 | 49.2153610 | 4.7224810  | H  | -2.5256095 | 49.2805599 | 4.8226019  |
| H  | -4.0690720 | 49.1962220 | 6.2033440  | H  | -4.0017855 | 49.2652074 | 6.3037903  |
| N  | -2.0631860 | 48.9807070 | 6.7277620  | N  | -1.9798104 | 49.1588239 | 6.8415691  |
| Cl | -0.5057380 | 52.6611040 | 12.0988810 | Cl | -0.7949429 | 52.5123224 | 11.8702034 |
| Cl | -2.7744560 | 52.2065830 | 9.9058820  | Cl | -3.0594129 | 52.5108142 | 9.6058482  |
| C  | -0.1259630 | 52.5574670 | 10.4055770 | C  | -0.3729097 | 52.5288843 | 10.1692462 |
| C  | 1.2930570  | 52.6047860 | 10.0669800 | C  | 1.0561993  | 52.4396465 | 9.8674311  |
| C  | -1.1040930 | 52.3805960 | 9.4631120  | C  | -1.3584464 | 52.5284457 | 9.1835915  |
| O  | 2.1932630  | 52.5897030 | 10.9204770 | O  | 1.9383056  | 52.2416207 | 10.7500839 |
| Cl | 0.9561720  | 52.3391410 | 5.9988200  | Cl | 0.7949481  | 52.5123220 | 5.7518006  |
| Cl | 3.2403050  | 52.7402040 | 8.1841410  | Cl | 3.0594173  | 52.5108032 | 8.0161586  |
| C  | 0.5851040  | 52.4419670 | 7.6925940  | C  | 0.3729162  | 52.5288838 | 7.4527595  |
| C  | -0.8164460 | 52.2549240 | 8.0411900  | C  | -1.0561948 | 52.4396454 | 7.7545736  |
| C  | 1.5661080  | 52.6064090 | 8.6327790  | C  | 1.3584497  | 52.5284417 | 8.4384130  |
| O  | -1.6842840 | 51.9569840 | 7.2017350  | O  | -1.9383048 | 52.2416241 | 6.8719267  |

### 3) TCNB/Bpe

|   |            |            |            |   |            |            |            |
|---|------------|------------|------------|---|------------|------------|------------|
| N | 4.4133400  | 0.6846120  | 1.6380120  | N | 4.4256932  | 0.9518025  | 1.5936377  |
| C | 3.9679470  | 1.7966970  | 1.0467890  | C | 3.8725211  | 2.0365048  | 1.0057697  |
| C | 2.8633210  | 1.8200870  | 0.2094170  | C | 2.7123698  | 1.9839142  | 0.2202720  |
| H | 2.5191860  | 2.7600030  | -0.2220640 | H | 2.3036639  | 2.8979632  | -0.2263135 |
| C | 2.1626300  | 0.6162800  | -0.0309200 | C | 2.0574116  | 0.7317700  | 0.0260106  |
| C | 2.6425230  | -0.5572000 | 0.6002210  | C | 2.6379748  | -0.4101261 | 0.6618631  |
| C | 3.7568680  | -0.4627080 | 1.4126560  | C | 3.8041615  | -0.2411610 | 1.4151734  |
| C | 0.9937700  | 0.6593780  | -0.8426300 | C | 0.8705691  | 0.6875755  | -0.7815360 |
| N | -2.0837870 | -2.6074260 | 1.1232010  | N | -2.4364565 | -2.4235123 | 1.1036051  |
| N | -1.4985670 | 3.8148000  | -0.4831530 | N | -1.1618618 | 4.1591128  | -0.3432921 |
| C | -1.6573010 | -1.5934030 | 1.5013720  | C | -1.8452124 | -1.4432202 | 1.4270797  |
| C | -1.0905730 | -0.3363140 | 1.8381730  | C | -1.0924037 | -0.2549206 | 1.7156270  |
| C | -1.5580950 | 0.8021580  | 1.1876470  | C | -1.4604127 | 0.9629586  | 1.1011555  |
| H | -2.4063490 | 0.7086180  | 0.5102550  | H | -2.3161485 | 0.9745167  | 0.4161179  |
| C | -0.9119030 | 2.0335640  | 1.2876310  | C | -0.7110401 | 2.1526513  | 1.2842484  |
| C | -1.2572820 | 3.0530410  | 0.3627750  | C | -0.9795031 | 3.2828933  | 0.4404369  |
| H | 4.1342720  | -1.3465520 | 1.9305470  | H | 4.2665064  | -1.1032023 | 1.9104517  |
| H | 0.4230560  | -1.3986990 | -0.6798760 | H | 0.3935163  | -1.3999543 | -0.5047260 |
| N | -3.4168540 | -0.4105350 | -3.3505390 | N | -3.3612639 | -0.8032238 | -3.5122022 |
| C | -2.9489180 | -1.5245620 | -2.7837250 | C | -2.8337239 | -1.8647234 | -2.8710306 |
| C | -1.7753880 | -1.5689260 | -2.0434090 | C | -1.7081695 | -1.7895129 | -2.0319452 |
| H | -1.4561450 | -2.4945980 | -1.5650490 | H | -1.3366572 | -2.6852197 | -1.5233387 |
| C | -1.0320090 | -0.3813180 | -1.8813320 | C | -1.0746456 | -0.5332539 | -1.8409392 |
| C | -1.5389060 | 0.8002610  | -2.4683760 | C | -1.6385377 | 0.5940674  | -2.5066022 |
| C | -2.7219600 | 0.7226440  | -3.1830350 | C | -2.7623590 | 0.3996410  | -3.3146540 |

|   |            |            |            |   |            |            |            |
|---|------------|------------|------------|---|------------|------------|------------|
| C | 0.1665990  | -0.4276960 | -1.1040580 | C | 0.0892698  | -0.4626110 | -0.9850625 |
| H | -3.1441370 | 1.6193350  | -3.6418760 | H | -3.2180500 | 1.2503709  | -3.8354561 |
| H | 0.7303790  | 1.6310300  | -1.2615030 | H | 0.5845059  | 1.6198140  | -1.2820527 |
| N | 1.5787790  | 4.3466290  | 2.3453160  | N | 1.7192528  | 4.3537089  | 2.7860920  |
| N | 1.2214750  | -2.2933880 | 3.7136450  | N | 1.0241187  | -2.5205384 | 3.5570353  |
| C | 0.9329840  | 3.3807870  | 2.3115890  | C | 1.0831149  | 3.3718575  | 2.5778436  |
| C | 0.2035490  | 2.1672220  | 2.2085650  | C | 0.3586928  | 2.1659267  | 2.2813968  |
| C | 0.6344140  | 1.0402720  | 2.9045960  | C | 0.7088393  | 0.9540552  | 2.9183624  |
| C | 0.0570320  | -0.2153180 | 2.7219860  | C | 0.0480236  | -0.2662331 | 2.6360008  |
| C | 0.6690970  | -1.3589420 | 3.2981050  | C | 0.5568547  | -1.4987378 | 3.1692125  |
| H | -1.0527200 | 1.7671280  | -2.3455430 | H | -1.2332671 | 1.6042099  | -2.3832040 |
| H | -3.5478630 | -2.4276550 | -2.9213050 | H | -3.3375482 | -2.8258050 | -3.0297635 |
| H | 2.1438580  | -1.5182060 | 0.4891430  | H | 2.1971974  | -1.4077836 | 0.5765842  |
| H | 4.5087410  | 2.7185350  | 1.2697390  | H | 4.3763202  | 2.9939407  | 1.1817569  |
| H | 1.4906730  | 1.1316340  | 3.5734680  | H | 1.5324172  | 0.9557518  | 3.6428450  |
